# Supplementary material for: Offering within-category food swaps to reduce energy density of food purchases: a study using an experimental online supermarket
Source: PubMed Central journal article supplement (PMC4488046; doi:10.1186/s12966-015-0241-1), 2015-06-25
Supplement: 12966_2015_241_MOESM1_ESM.pdf [file 12966_2015_241_MOESM1_ESM.pdf]

1 Supplementary Table 1: Platform development method

|                                                | List-Repeating                                                                                                                                                                                                                               | List-Matched                                                                                                                                                                                                                                                                                                                               | List-Category                                                                                                                                                   | Meal                                                                                                                                                                                                                                                            |
|------------------------------------------------|----------------------------------------------------------------------------------------------------------------------------------------------------------------------------------------------------------------------------------------------|--------------------------------------------------------------------------------------------------------------------------------------------------------------------------------------------------------------------------------------------------------------------------------------------------------------------------------------------|-----------------------------------------------------------------------------------------------------------------------------------------------------------------|-----------------------------------------------------------------------------------------------------------------------------------------------------------------------------------------------------------------------------------------------------------------|
| <b>Please can you buy the following items:</b> | <ul style="list-style-type: none"> <li>• A loaf of bread (approx. 800g loaf)</li> <li>• Soup for a light evening meal</li> <li>• A packet of ready-to-eat meat or fish, or a packet of cheese</li> <li>• 1 pack of sweet biscuits</li> </ul> | <ul style="list-style-type: none"> <li>• <i>A large bag/ A multipack of 6 small bags</i> of crisps for sharing.</li> <li>• <i>Frozen/Chilled</i> dairy dessert for 6 people</li> <li>• Meat or fish <i>for cooking on a barbecue/ a roast lunch</i> (approx. 500g)</li> <li>• Non-alcoholic drinks for <i>on-the-go/ a meal</i></li> </ul> | <ul style="list-style-type: none"> <li>• A side dish to have with a main meal</li> <li>• A snack to have between meals</li> <li>• A sandwich filling</li> </ul> | Using the website, please choose all the food and drink you would need for a regular weekday main meal for a family of 4 (2 adults and 2 older teenagers). You don't need to buy any items that you might need for preparing the food like oil, salt or pepper. |
| <b>Budget:</b>                                 | £7                                                                                                                                                                                                                                           | £8                                                                                                                                                                                                                                                                                                                                         | £6                                                                                                                                                              | £10                                                                                                                                                                                                                                                             |

2
