# Supplementary material for: Offering within-category food swaps to reduce energy density of food purchases: a study using an experimental online supermarket
Source: PubMed Central journal article supplement (PMC4488046; doi:10.1186/s12966-015-0241-1), 2015-06-25
Supplement: 12966_2015_241_MOESM2_ESM.pdf [file 12966_2015_241_MOESM2_ESM.pdf]

Supplementary Table 2: Platform development results

|                                                                                | List-Repeating  |           |            | List-Matched     |           |            | List-Category   |           |            | Meal             |           |            |  |
|--------------------------------------------------------------------------------|-----------------|-----------|------------|------------------|-----------|------------|-----------------|-----------|------------|------------------|-----------|------------|--|
| <b>Minutes taken/ median (IQR)</b>                                             | 6.0 (4.1 – 9.3) |           |            | 8.2 (5.7 – 11.2) |           |            | 4.2 (2.6 – 6.2) |           |            | 7.7 (4.9 – 11.1) |           |            |  |
| <b>Product outcomes</b>                                                        |                 |           |            |                  |           |            |                 |           |            |                  |           |            |  |
| <b>N participants buying 2+ foods bought by other participants (out of 85)</b> | 39              |           |            | 45               |           |            | 2               |           |            | 52               |           |            |  |
| <b>N participants buying 2+ foods (2+ shelves) in both sessions out of 85</b>  | 13 (78)         |           |            | 2 (39)           |           |            | 7 (27)          |           |            | 18 (59)          |           |            |  |
|                                                                                | <b>Mean</b>     | <b>CV</b> | <b>ICC</b> | <b>Mean</b>      | <b>CV</b> | <b>ICC</b> | <b>Mean</b>     | <b>CV</b> | <b>ICC</b> | <b>Mean</b>      | <b>CV</b> | <b>ICC</b> |  |
| <b>Nutrient outcomes</b>                                                       |                 |           |            |                  |           |            |                 |           |            |                  |           |            |  |
| <b>Total Energy (MJ)</b>                                                       | 18.19           | 0.21      | 0.39       | 11.16            | 0.39      | 0.21       | 6.31            | 0.57      | 0.44       | 19.48            | 0.52      | 0.23       |  |
| <b>Energy Density* (kJ/100g)</b>                                               | 993.0           | 0.16      | 0.27       | 849.3            | 0.29      | 0.08       | 709.4           | 0.53      | 0.30       | 523.5            | 0.45      | 0.27       |  |
| <b>SFA (% energy)</b>                                                          | 12.60           | 0.44      | 0.21       | 12.04            | 0.54      | 0.00       | 13.40           | 0.70      | 0.31       | 12.67            | 0.57      | 0.10       |  |
| <b>Sugar (% energy)</b>                                                        | 10.86           | 0.35      | 0.36       | 19.78            | 0.43      | 0.00       | 23.33           | 0.68      | 0.18       | 13.69            | 0.72      | 0.40       |  |
| <b>Fibre (g per MJ)</b>                                                        | 3.40            | 0.33      | 0.34       | 0.94             | 0.65      | 0.06       | 4.24            | 0.57      | 0.43       | 3.58             | 0.57      | 0.35       |  |
| <b>Sodium (mg per MJ)</b>                                                      | 360.6           | 0.29      | 0.23       | 281.5            | 0.43      | 0.00       | 399.7           | 0.68      | 0.23       | 285.3            | 0.66      | 0.08       |  |
| <b>Nutrient score (35) (weighted by energy)</b>                                | 4.90            | n/a       | 0.27       | 5.46             | n/a       | 0.00       | 2.73            | n/a       | 0.38       | 1.07             | n/a       | 0.02       |  |
| <b>Food Group outcomes</b>                                                     |                 |           |            |                  |           |            |                 |           |            |                  |           |            |  |
| <b>Fruit &amp; Vegetables (% weight)</b>                                       | 0.48†           | 0.53      | 0.36       | 2.38†            | 0.32      | 0.00       | 52.38           | 0.45      | 0.52       | 41.78            | 0.39      | 0.52       |  |
| <b>Healthier (% products)</b>                                                  | 21.45           | 0.34      | 0.70       | 14.73            | 0.49      | 0.03       | 40.98           | 0.48      | 0.66       | 62.61            | 0.25      | 0.38       |  |
| <b>Less healthy (% products)</b>                                               | 46.16           | 0.27      | 0.52       | 44.77            | 0.28      | 0.00       | 27.59           | 0.53      | 0.51       | 17.92            | 0.44      | 0.04       |  |

\*: Calculated for food only, excluding drinks.(25)

†: No fruit or vegetable items were included in these task
