# Supplementary material for: Offering within-category food swaps to reduce energy density of food purchases: a study using an experimental online supermarket
Source: PubMed Central journal article supplement (PMC4488046; doi:10.1186/s12966-015-0241-1), 2015-06-25
Supplement: 12966_2015_241_MOESM3_ESM.pdf [file 12966_2015_241_MOESM3_ESM.pdf]

Supplementary Table 3: Participant Demographics

|                                         |                      | <b>All<br/>(n=720)</b> | <b>Control<br/>(n=159)</b> | <b>Consent-<br/>checkout<br/>(n=137)</b> | <b>Consent-<br/>selection<br/>(n=131)</b> | <b>Imposed-<br/>checkout<br/>(n=141)</b> | <b>Imposed-<br/>selection<br/>(n=152)</b> |
|-----------------------------------------|----------------------|------------------------|----------------------------|------------------------------------------|-------------------------------------------|------------------------------------------|-------------------------------------------|
| BMI status                              | Lean (18 to <25)     | 42.2%                  | 44.7%                      | 36.5%                                    | 42.0%                                     | 50.4%                                    | 37.5%                                     |
|                                         | O'weight (25 to <30) | 30.8%                  | 31.4%                      | 30.7%                                    | 32.1%                                     | 27.7%                                    | 32.2%                                     |
|                                         | Obese (30+)          | 26.8%                  | 23.9%                      | 32.8%                                    | 26.0%                                     | 22.0%                                    | 29.6%                                     |
| Age                                     | Mean (s.d.)          | 44.4<br>(14.13)        | 43.4<br>(14.38)            | 45.6<br>(14.49)                          | 45.4<br>(14.43)                           | 43.2<br>(13.37)                          | 44.8<br>(13.98)                           |
|                                         | Gender               | % female               | 62.2%                      | 62.89%                                   | 65.69%                                    | 61.07%                                   | 65.25%                                    |
| Diet for<br>weight loss/<br>maintenance | % dieting            | 34.7%                  | 39.0%                      | 35.8%                                    | 34.4%                                     | 31.9%                                    | 32.2%                                     |
| Education                               | No quals.            | 4.7%                   | 4.4%                       | 5.1%                                     | 2.3%                                      | 3.5%                                     | 7.9%                                      |
|                                         | Up to 4 GCSE's       | 17.2%                  | 19.5%                      | 12.4%                                    | 20.6%                                     | 16.3%                                    | 17.1%                                     |
|                                         | Up to 1 A-level      | 20.4%                  | 20.8%                      | 22.6%                                    | 21.4%                                     | 16.3%                                    | 21.1%                                     |
|                                         | 2+ A-levels          | 22.5%                  | 26.4%                      | 18.2%                                    | 24.4%                                     | 25.5%                                    | 17.8%                                     |
|                                         | First Degree         | 23.8%                  | 20.1%                      | 27.0%                                    | 19.8%                                     | 28.4%                                    | 23.7%                                     |
| IMD Quintiles                           | Further Degree       | 11.4%                  | 8.8%                       | 14.6%                                    | 11.5%                                     | 9.9%                                     | 12.5%                                     |
|                                         | Not available*       | 16.8%                  | 13.2%                      | 22.6%                                    | 16.8%                                     | 15.6%                                    | 16.4%                                     |
|                                         | 1                    | 15.4%                  | 13.8%                      | 13.1%                                    | 18.3%                                     | 12.8%                                    | 19.1%                                     |
|                                         | 2                    | 18.3%                  | 20.8%                      | 16.1%                                    | 22.1%                                     | 15.6%                                    | 17.1%                                     |
|                                         | 3                    | 17.8%                  | 22.6%                      | 20.4%                                    | 11.5%                                     | 17.7%                                    | 15.8%                                     |
|                                         | 4                    | 16.3%                  | 13.8%                      | 14.6%                                    | 12.2%                                     | 24.8%                                    | 15.8%                                     |
|                                         | 5                    | 15.4%                  | 15.7%                      | 13.1%                                    | 19.1%                                     | 13.5%                                    | 15.8%                                     |

\*Participants from Scotland, Wales or Northern Ireland
