# Supplementary material for: Offering within-category food swaps to reduce energy density of food purchases: a study using an experimental online supermarket
Source: PubMed Central journal article supplement (PMC4488046; doi:10.1186/s12966-015-0241-1), 2015-06-25
Supplement: 12966_2015_241_MOESM5_ESM.pdf [file 12966_2015_241_MOESM5_ESM.pdf]

Supplementary Table 4: Participant Latent demand and online shopping experience

| Study Participants<br>(n=720)        | Never or<br>not in the<br>last year | 1-3 times in<br>the last year | 4-11 times in<br>the last year | 1-3 times<br>a month | At least<br>once a<br>week |
|--------------------------------------|-------------------------------------|-------------------------------|--------------------------------|----------------------|----------------------------|
| Online Shopping – food               | 47.5%                               | 17.8%                         | 16.8%                          | 11.7%                | 6.3%                       |
| Online shopping – non food           | 3.5%                                | 9.6%                          | 42.2%                          | 38.3%                | 6.4%                       |
| Latent purchasing demand             |                                     |                               |                                |                      |                            |
| Bread                                | 0.3%                                | 1.4%                          | 3.3%                           | 12.1%                | 82.9%                      |
| Soup                                 | 5.4%                                | 10.4%                         | 17.8%                          | 34.2%                | 32.2%                      |
| Ready-to-eat meat or fish or cheese  | 1.8%                                | 2.5%                          | 6.9%                           | 31.5%                | 57.2%                      |
| Sweet biscuits                       | 1.3%                                | 7.4%                          | 14.9%                          | 33.9%                | 42.6%                      |
| Crisps or savory snack               | 1.0%                                | 5.6%                          | 13.5%                          | 31.8%                | 48.2%                      |
| Dairy dessert                        | 3.2%                                | 9.4%                          | 14.6%                          | 26.5%                | 46.3%                      |
| Meat or fish for roast lunch         | 1.1%                                | 6.0%                          | 10.6%                          | 21.9%                | 60.4%                      |
| Pasta/Rice/couscous or other starch  | 3.2%                                | 9.4%                          | 14.6%                          | 26.5%                | 46.3%                      |
| A side dish                          | 1.1%                                | 6.0%                          | 10.6%                          | 21.9%                | 60.4%                      |
| A snack for between meals            | 1.1%                                | 4.2%                          | 10.6%                          | 19.2%                | 65.0%                      |
| A sandwich filling                   | 7.4%                                | 8.8%                          | 13.5%                          | 19.9%                | 50.6%                      |
| A treat for you to eat straight away | 1.1%                                | 8.5%                          | 13.2%                          | 22.9%                | 54.3%                      |
